# Supplementary material for: Virtual Screening for Reactive Natural Products and Their Probable Artifacts of Solvolysis and Oxidation
Source: MDPI journal article supplement (doi:10.3390/biom10111486), 2020-10-27
Supplement: s1 [file s1]

The result data set of “Virtual Screening for Reactive Natural Products and Their Probable Artifacts of Solvolysis and Oxidation”

Tingjun Xu et al.

| Reactive natural product                                                            | Probable artifact                                                                   | Probable cause | Biological source          | References                                                                                               |
|-------------------------------------------------------------------------------------|-------------------------------------------------------------------------------------|----------------|----------------------------|----------------------------------------------------------------------------------------------------------|
| 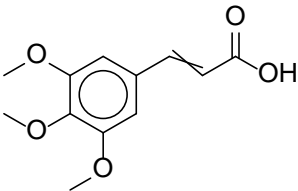   |    | Solvolysis     | <i>Polygala tenuifolia</i> | Zhongguo Zhongyao Zazhi, 33(11), 1278-1280<br>Zhongguo Yaowu Huaxue Zazhi, 15(1), 35-38                  |
|    |    | Solvolysis     | <i>Descurainia sophia</i>  | Journal of Asian Natural Products Research, 7(6), 853-856<br>Shenyang Yaoke Daxue Xuebao, 20(6), 419-421 |
|   |   | Solvolysis     | <i>Curcuma longa</i>       | Food Chemistry, 119(3), 974-980<br>Tianran Chanwu Yanjiu Yu Kaifa, 15(2), 98-100                         |
|  |  | Solvolysis     | <i>Usnea longissima</i>    | Phytochemistry, 26(12), 3181-3185<br>Yunnan Zhiwu Yanjiu, 8(4), 483-488                                  |

|                                                                                     |                                                                                     |            |                             |                                                                                         |
|-------------------------------------------------------------------------------------|-------------------------------------------------------------------------------------|------------|-----------------------------|-----------------------------------------------------------------------------------------|
| 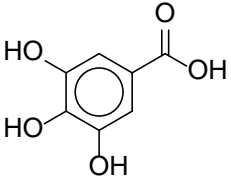   |    | Solvolysis | <i>Dimocarpus longan</i>    | Food Chemistry, 116(2), 433-436<br>Huazhong Keji Daxue Xuebao, Yixueban, 38(4), 524-526 |
|    |    | Solvolysis | <i>Chamaecrista greggii</i> | Phytochemistry, 37(3), 837-845                                                          |
|    |    | Solvolysis | <i>Onosma hispidum</i>      | Chemical & Pharmaceutical Bulletin, 53(8), 907-910                                      |
|   |   | Solvolysis | <i>Pectis elongata</i>      | Flavour and Fragrance Journal, 20(5), 462-464                                           |
|  |  | Solvolysis | <i>Vitex leptobotrys</i>    | Phytochemistry, 49(8), 2603-2605                                                        |

|                                                                                     |                                                                                     |            |                               |                                                                               |
|-------------------------------------------------------------------------------------|-------------------------------------------------------------------------------------|------------|-------------------------------|-------------------------------------------------------------------------------|
| 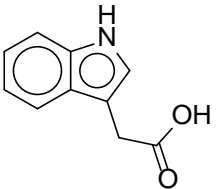   |    | Solvolysis | <i>Isatis tinctoria</i>       | Xiandai Zhongyao Yanjiu Yu Shijian, 23(2), 54-56<br>Planta Med., 61(1), 95-96 |
|    |    | Solvolysis | <i>Calanthe arisanensis</i>   | Bioorganic & Medicinal Chemistry Letters, 18(15), 4275-4277                   |
|    |    | Oxidation  | <i>Artemisia annua</i>        | Flavour Fragrance J., 12(4), 241-246                                          |
|    |    | Solvolysis | <i>Artemisia annua</i>        | Flavour Fragrance J., 12(4), 241-246                                          |
|   |   | Solvolysis | <i>Bistorta manshuriensis</i> | Natural Product Sciences, 15(4), 234-240                                      |
|  |  | Solvolysis | <i>Ozoroa insignis</i>        | Journal of the Brazilian Chemical Society, 17(3), 527-532                     |
|  |  | Solvolysis | <i>Cucurbita pepo</i>         | Agric. Biol. Chem., 41(1), 175-180                                            |

|                                                                                     |                                                                                     |            |                                |                                                                        |
|-------------------------------------------------------------------------------------|-------------------------------------------------------------------------------------|------------|--------------------------------|------------------------------------------------------------------------|
| 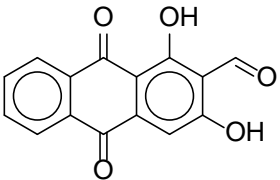   |    | Solvolysis | <i>Rubia wallichiana</i>       | Chemical & Pharmaceutical Bulletin, 51(8), 948-950                     |
|    |    | Solvolysis | <i>Brassica napus</i>          | Journal of Agricultural and Food Chemistry, 62(13), 2935-2945          |
|    |    | Solvolysis | <i>Zanthoxylum nitidum</i>     | Zhongcaoyao, 40(4), 538-540<br>Chemistry & Biodiversity, 3(9), 990-995 |
|   |   | Solvolysis | <i>galium sinaicum</i>         | Phytochemistry, Volume Date 1992, 31(1), 355-356                       |
|  |  | Solvolysis | <i>Vibrio parahaemolyticus</i> | J. Nat. Prod., 57(11), 1587-1590                                       |

|                                                                                     |                                                                                     |            |                                               |                                                                                                                                                                       |
|-------------------------------------------------------------------------------------|-------------------------------------------------------------------------------------|------------|-----------------------------------------------|-----------------------------------------------------------------------------------------------------------------------------------------------------------------------|
| 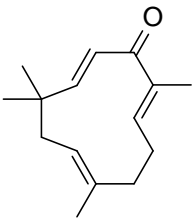   |    | Oxidation  | <i>Zingiber zerumbet</i>                      | Journal of Essential Oil Research, 15(3), 202-205<br>J. Essent. Oil Res., 5(1), 55-59                                                                                 |
|    |    | Solvolysis | <i>Gladiolus gandavensis</i>                  | Journal of Asian Natural Products Research, 7(3), 197-204                                                                                                             |
|    |    | Solvolysis | <i>Mangifera indica</i>                       | J. Agric. Food Chem., 46(3), 1094-1100<br>Phytochemistry, 24(10), 2313-2316<br>Food Science and Technology Research, 7(3), 200-206<br>Food Chemistry, 114(1), 363-372 |
|   |   | Solvolysis | <i>Justicia diffusa</i> var. <i>prostrata</i> | Journal of Asian Natural Products Research, 2(4), 289-300                                                                                                             |
|  |  | Solvolysis | <i>Streptomyces</i> sp. SCSIO1042             | Zhongguo Haiyang Yaowu, 33(1), 45-52                                                                                                                                  |

|                                                                                     |                                                                                     |            |                             |                                                                                                                  |
|-------------------------------------------------------------------------------------|-------------------------------------------------------------------------------------|------------|-----------------------------|------------------------------------------------------------------------------------------------------------------|
| 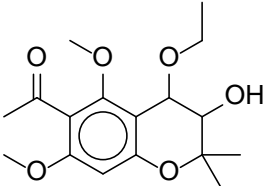   |    | Solvolysis | <i>Evodia leptae</i>        | Phytochemistry, Volume Date 1998, 47(1), 101-104<br>Zhiwu Xuebao, 39(7), 670-674                                 |
|    |    | Solvolysis | <i>Picrasma quassioides</i> | Chem. Pharm. Bull., 32(9), 3579-3583<br>Huaxue Xuebao, 42(7), 679-683                                            |
|    |    | Solvolysis | <i>Ozoroa insignis</i>      | Biochemical Systematics and Ecology, 37(2), 116-119<br>Journal of the Brazilian Chemical Society, 17(3), 527-532 |
|    |    | Solvolysis | <i>Equisetum fluviatile</i> | Journal of Essential Oil Research, 20(5), 437-441                                                                |
|  |  | Solvolysis | <i>Citrus grandis</i>       | Shenyang Yaoke Daxue Xuebao, 17(4), 253-255<br>Zhongcaoyao, 36(3), 341-343                                       |

|                                                                                     |                                                                                     |            |                          |                                                                                                                        |
|-------------------------------------------------------------------------------------|-------------------------------------------------------------------------------------|------------|--------------------------|------------------------------------------------------------------------------------------------------------------------|
| 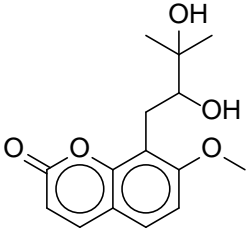   |    | Solvolysis | <i>Citrus grandis</i>    | Zhongcaoyao, 36(3), 341-343<br>Zhongguo Zhongyao Zazhi, 26(11), 764-765<br>Shenyang Yaoke Daxue Xuebao, 17(4), 253-255 |
|    |    | Solvolysis | <i>Murraya exotica</i>   | Chem. Pharm. Bull., 35(10), 4277-4285                                                                                  |
|    |   | Solvolysis | <i>Toddalia asiatica</i> | Yakugaku Zasshi, 111(7), 365-375                                                                                       |
|  |  | Oxidation  | <i>Toddalia asiatica</i> | Yakugaku Zasshi, 111(7), 376-385<br>Fitoterapia, 71(6), 636-640                                                        |

|                                                                                     |                                                                                     |            |                                |                                               |
|-------------------------------------------------------------------------------------|-------------------------------------------------------------------------------------|------------|--------------------------------|-----------------------------------------------|
| 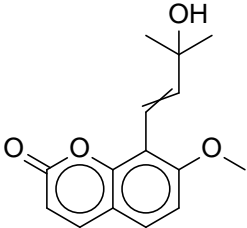   |    | Oxidation  | <i>Murraya exotica</i>         | Chem. Pharm. Bull., 35(10), 4277-4285         |
|    |    | Solvolysis | <i>Protium javanicum</i>       | Journal of Chemical Ecology, 36(7), 720-726   |
|    |    | Solvolysis | <i>Ledebouria graminifolia</i> | Phytochemistry (Elsevier), 62(5), 797-804     |
|   |   | Solvolysis | <i>Tournefortia sarmentosa</i> | Journal of Natural Products, 65(5), 745-747   |
|  |  | Solvolysis | <i>Cryptocarya chinensis</i>   | Journal of Natural Products, 73(9), 1470-1475 |



|                                                                                     |                                                                                     |            |                                               |                                                           |
|-------------------------------------------------------------------------------------|-------------------------------------------------------------------------------------|------------|-----------------------------------------------|-----------------------------------------------------------|
| 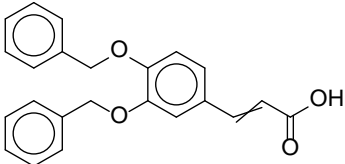   |    | Solvolysis | <i>Justicia diffusa</i> var. <i>prostrata</i> | Journal of Asian Natural Products Research, 2(4), 289-300 |
|    |    | Oxidation  | <i>Pseudomonas aeruginosa</i>                 | Monatsh. Chem., 110(4), 947-53                            |
|    |    | Solvolysis | <i>Woodsia scopulina</i>                      | Phytochemistry, 49(3), 859-862                            |
|   |   | Solvolysis | <i>Picrasma quassioides</i>                   | Zhongcaoyao, 38(6), 807-810                               |
|  |  | Solvolysis | <i>Fusarium</i> sp                            | Chemistry of Natural Compounds, 50(6), 1103-1105          |

|                                                                                     |                                                                                     |            |                                                     |                                                                                    |
|-------------------------------------------------------------------------------------|-------------------------------------------------------------------------------------|------------|-----------------------------------------------------|------------------------------------------------------------------------------------|
| 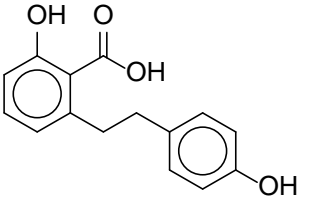   |    | Solvolysis | <i>Ricciocarpos natans</i>                          | Planta Med., 56(5), 444-5<br>Phytochemistry, 31(11), 3981-3                        |
|    |    | Solvolysis | <i>penicillium verrucosum</i> var. <i>cyclopium</i> | J. Nat. Prod., 51(1), 66-73                                                        |
|    |    | Solvolysis | <i>Sophora japonica</i>                             | Journal of Asian Natural Products Research, 4(1), 1-5<br>Zhongcaoyao, 33(1), 20-21 |
|    |   | Solvolysis | <i>Erythrina ?bidwillii</i>                         | Heterocycles, 71(8), 1779-1785                                                     |
|  |  | Oxidation  | <i>Citrus paradisi Macf.</i>                        | Chem. Pharm. Bull., 44(4), 804-809                                                 |

|                                                                                    |                                                                                    |           |                               |                                               |
|------------------------------------------------------------------------------------|------------------------------------------------------------------------------------|-----------|-------------------------------|-----------------------------------------------|
| 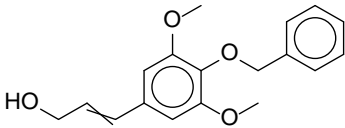  |   | Oxidation | <i>Ligularia nelumbifolia</i> | Journal of Natural Products, 65(6), 902-908   |
|   |   | Oxidation | <i>Ferula latipinna</i>       | J. Nat. Prod., 51(6), 1140-1147               |
|   |   | Oxidation | <i>Ligularia nelumbifolia</i> | Journal of Natural Products, 65(6), 902-908   |
|   |   | Oxidation | <i>Murraya koenigii</i>       | Chem. Pharm. Bull., 41(12), 2096-20100        |
|  |  | Oxidation | <i>Musa acuminata</i>         | Biosci., Biotechnol., Biochem., 62(1), 95-101 |

|                                                                                     |                                                                                     |           |                                                        |                                                                            |
|-------------------------------------------------------------------------------------|-------------------------------------------------------------------------------------|-----------|--------------------------------------------------------|----------------------------------------------------------------------------|
| 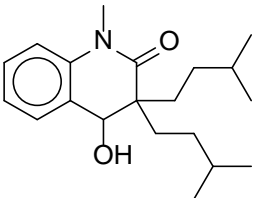   |    | Oxidation | <i>Esenbeckia almarwillia</i>                          | Natural Product Communications, 1(4), 313-318                              |
|    |    | Oxidation | <i>Esenbeckia almarwillia</i>                          | Biochemical Systematics and Ecology, 32(9), 817-821                        |
|    |    | Oxidation | <i>Artemisia campestris</i><br><i>subsp. glutinosa</i> | Phytochemistry, 22(11), 2587-2589                                          |
|   |   | Oxidation | <i>Stereospermum</i><br><i>personatum</i>              | Journal of Natural Products, 68(11), 1615-1621                             |
|  |  | Oxidation | <i>Clausena lansium</i>                                | Phytochemistry, 28(2), 621-622<br>Chin. Pharm. J. (Taipei), 48(5), 367-373 |

|                                                                                     |                                                                                     |           |                                 |                                                                                     |
|-------------------------------------------------------------------------------------|-------------------------------------------------------------------------------------|-----------|---------------------------------|-------------------------------------------------------------------------------------|
| 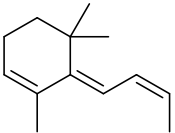   |    | Oxidation | <i>Averrhoa carambola</i>       | Guoshu Xuebao, 25(1), 119-121<br>Flavour Fragrance J., 7(4), 179-185                |
|    |    | Oxidation | <i>Ruta angustifolia</i>        | Phytochemistry, 25(9), 2209-2210<br>J. Essent. Oil Res., 3(5), 355-357              |
|    |    | Oxidation | <i>Stereospermum personatum</i> | Journal of Natural Products, 68(11), 1615-1621                                      |
|    |    | Oxidation | <i>Cannabis sativa</i>          | Pharm. Acta Helv., 59(8), 216-224<br>J. Chem. Soc., Perkin Trans. 1, (7), 1455-1466 |
|  |  | Oxidation | <i>Coelospermum billardieri</i> | J. Nat. Prod., 51(5), 829-835                                                       |

|                                                                                     |                                                                                     |           |                               |                                                                                                    |
|-------------------------------------------------------------------------------------|-------------------------------------------------------------------------------------|-----------|-------------------------------|----------------------------------------------------------------------------------------------------|
| 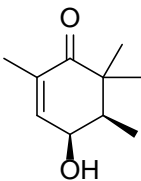   |    | Oxidation | <i>Iris germanica</i>         | Helv. Chim. Acta, 72(6), 1400-1415                                                                 |
|    |    | Oxidation | <i>Citrus paradisi Macf.</i>  | Chem. Pharm. Bull., 44(4), 804-809                                                                 |
|    |    | Oxidation | <i>Iris germanica</i>         | Helv. Chim. Acta, 72(6), 1400-1415                                                                 |
|    |    | Oxidation | <i>Cupressus sempervirens</i> | Parfums, Cosmet., Aromes, 20, 33-6, 39-41                                                          |
|  |  | Oxidation | <i>Aristolochia elegans</i>   | Bioorganic & Medicinal Chemistry, 12(2), 439-446<br>Journal of Natural Products, 65(11), 1522-1525 |
|  |  | Oxidation | <i>Averrhoa carambola</i>     | Guoshu Xuebao, 25(1), 119-121<br>Flavour Fragrance J., 7(4), 179-185                               |

|                                                                                     |                                                                                     |           |                                                 |                                                                           |
|-------------------------------------------------------------------------------------|-------------------------------------------------------------------------------------|-----------|-------------------------------------------------|---------------------------------------------------------------------------|
| 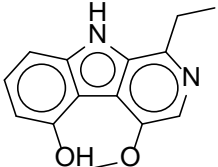   |    | Oxidation | <i>Picrasma javanica</i>                        | Aust. J. Chem., 40(9), 1527-1536<br>Chem. Pharm. Bull., 41(12), 2101-2105 |
|    |    | Oxidation | <i>Citrullus vulgaris</i>                       | Agric. Biol. Chem., 49(11), 3145-3150                                     |
|    |    | Oxidation | <i>Mentha spicata</i>                           | Harbin Shangye Daxue Xuebao, Ziran Kexueban, 19(1), 72-74, 92             |
|    |    | Oxidation | <i>Tabebuia ochracea</i><br><i>neochrysanta</i> | J. Nat. Prod., 59(4), 423-424                                             |
|   |   | Oxidation | <i>Pholiota destruens</i>                       | Nat. Prod. Lett., 5(3), 171-174                                           |
|  |  | Oxidation | <i>Artemisia capillaris</i>                     | Phytochemistry, 21(8), 2009-2011                                          |

|                                                                                     |                                                                                     |           |                              |                                                                                        |
|-------------------------------------------------------------------------------------|-------------------------------------------------------------------------------------|-----------|------------------------------|----------------------------------------------------------------------------------------|
| 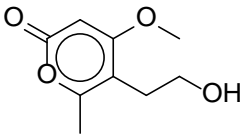   |    | Oxidation | <i>Macrophoma commelinae</i> | Chem. Pharm. Bull., 31(10), 3781-3784<br>Chem. Pharm. Bull., 36(4), 1328-1335          |
|    |    | Oxidation | <i>Macrophoma commelinae</i> | Chem. Pharm. Bull., 31(10), 3781-3784<br>Chem. Pharm. Bull., 36(4), 1328-1335          |
|    |    | Oxidation | <i>Chrysanthemum indicum</i> | Chemistry & Biodiversity, 7(12), 2951-2962<br>Anjisuan He Shengwu Ziyuan, 31(4), 69-75 |
|    |    | Oxidation | <i>Datura stramonium</i>     | Biochemical Systematics and Ecology, 33(10), 1017-1029                                 |
|   |   | Oxidation | <i>Senecio scandens</i>      | Biochemical Systematics and Ecology, 35(12), 901-904                                   |
|  |  | Oxidation | <i>Clausena lansium</i>      | Phytochemistry, 28(2), 621-622<br>Chin. Pharm. J. (Taipei), 48(5), 367-373             |



|                                                                                     |                                                                                     |           |                                                 |                                                                                                                                    |
|-------------------------------------------------------------------------------------|-------------------------------------------------------------------------------------|-----------|-------------------------------------------------|------------------------------------------------------------------------------------------------------------------------------------|
| 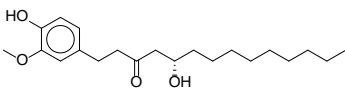   |    | Oxidation | <i>Zingiber officinale</i>                      | AFS, Advances in Food Sciences, 25(1), 2-7<br>Phytotherapy Research, 17(8), 897-902                                                |
|    |    | Oxidation | <i>Datura stramonium</i>                        | Biochemical Systematics and Ecology, 33(10), 1017-1029                                                                             |
|    |    | Oxidation | <i>helichrysum italicum</i>                     | Journal of Natural Products, 64(10), 1360-1362<br>Phytochemistry, 29(4), 1093-1095                                                 |
|    |    | Oxidation | <i>Tabebuia ochracea</i><br><i>neochrysanta</i> | J. Nat. Prod., 59(4), 423-424                                                                                                      |
|   |   | Oxidation | <i>Malus pumila</i>                             | Acta Horticulturae, 814(Proceedings of the XIIth<br>Eucarpia Symposium on Fruit Breeding and Genetics,<br>2007, Volume 2), 545-549 |
|  |  | Oxidation | <i>Kigelia pinnata</i>                          | Phytochemistry, 32(4), 1015-1018                                                                                                   |

|                                                                                     |                                                                                     |           |                             |                                                                                                     |
|-------------------------------------------------------------------------------------|-------------------------------------------------------------------------------------|-----------|-----------------------------|-----------------------------------------------------------------------------------------------------|
| 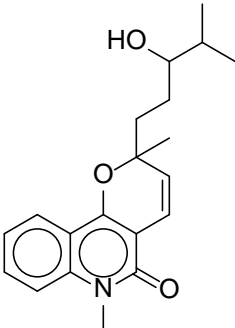   |    | Oxidation | <i>Zanthoxylum simulans</i> | Phytochemistry, 42(1), 217-219<br>Phytochemistry, 46(3), 525-529<br>J. Nat. Prod., 57(9), 1206-1211 |
|    |    | Oxidation | <i>Thymus vulgaris</i>      | Flavour Fragrance J., 13(4), 259-262                                                                |
|    |    | Oxidation | <i>Hyssopus officinalis</i> | Dev. Food Sci., 18(Flavors Fragrances), 171-176<br>Parfuem. Kosmet., 67(2), 116, 118                |
|   |   | Oxidation | <i>Arenaria kansuensis</i>  | Chem. Pharm. Bull., 37(7), 1808-1809                                                                |
|  |  | Oxidation | <i>Fusarium lateritium</i>  | Can. J. Chem., 71(9), 1362-1367                                                                     |

|                                                                                     |                                                                                     |           |                                |                                                                                                                                |
|-------------------------------------------------------------------------------------|-------------------------------------------------------------------------------------|-----------|--------------------------------|--------------------------------------------------------------------------------------------------------------------------------|
| 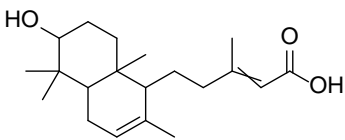   |    | Oxidation | <i>Leyssera gnaphalodes</i>    | Phytochemistry, 30(1), 211-2113                                                                                                |
|    |    | Oxidation | <i>Lindera lucida</i>          | Phytochemistry, 49(7), 2141-2143                                                                                               |
|    |    | Oxidation | <i>Dionysia diapiensifolia</i> | Journal of Essential Oil Research, 22(5), 386-388                                                                              |
|    |    | Oxidation | <i>Morinda citrifolia</i>      | Natural Product Research, Part A: Structure and Synthesis, 22(13), 1128-1136<br>Archives of Pharmacal Research, 30(8), 919-923 |
|  |  | Oxidation | <i>Lycopus europaeus</i>       | J. Nat. Prod., 63(3), 419-421                                                                                                  |

|                                                                                     |                                                                                     |           |                                  |                                                                                                                                                           |
|-------------------------------------------------------------------------------------|-------------------------------------------------------------------------------------|-----------|----------------------------------|-----------------------------------------------------------------------------------------------------------------------------------------------------------|
| 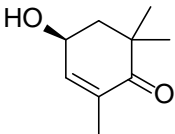   |    | Oxidation | <i>Crocus sativus</i>            | Chemical & Pharmaceutical Bulletin, 50(10), 1305-1309<br>Journal of Chromatography, A, 1216(33), 6088-6097<br>Zhongguo Xiandai Zhongyao, 10(5), 15-17, 46 |
|    |    | Oxidation | <i>Peucedanum paniculatum</i>    | Phytochemistry (Elsevier), 66(16), 1956-1962                                                                                                              |
|    |    | Oxidation | <i>Nothapodytes foetida</i>      | Phytochemistry (Elsevier), 62(3), 461-470<br>Phytochemistry, 42(3), 907-908                                                                               |
|    |    | Oxidation | <i>Thespesia populnea</i>        | Journal of Natural Products, 71(7), 1173-1177                                                                                                             |
|  |  | Oxidation | <i>Herpetospermum caudigerum</i> | Chemical & Pharmaceutical Bulletin, 56(2), 192-193                                                                                                        |

|                                                                                     |                                                                                     |            |                                 |                                                                                                                             |
|-------------------------------------------------------------------------------------|-------------------------------------------------------------------------------------|------------|---------------------------------|-----------------------------------------------------------------------------------------------------------------------------|
| 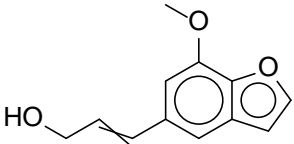   |    | Oxidation  | <i>Zanthoxylum wutaense</i>     | Journal of Natural Products, 71(7), 1146-1151                                                                               |
|    |    | Oxidation  | <i>Gynura elliptica</i>         | Phytochemistry, 53(8), 833-836                                                                                              |
|    |    | Oxidation  | <i>helichrysum sutherlandii</i> | Phytochemistry, 17(11), 1935-1937                                                                                           |
|    |    | Solvolysis | <i>Cedrus libani</i>            | Fitoterapia, 78(4), 323-326<br>Asian Journal of Chemistry, 17(4), 2300-2306<br>Asian Journal of Chemistry, 21(4), 2684-2694 |
|   |   | Oxidation  | <i>porphyra tenera</i>          | Dev. Food Sci., 10(Prog. Flavour Res.), 281-300                                                                             |
|  |  | Oxidation  | <i>Lippia multiflora</i>        | Flavour and Fragrance Journal, 20(1), 34-38<br>Phytochemistry, 29(2), 521-522<br>J. Essent. Oil Res., 6(6), 623-630         |

|                                                                                     |                                                                                     |           |                                  |                                                                              |
|-------------------------------------------------------------------------------------|-------------------------------------------------------------------------------------|-----------|----------------------------------|------------------------------------------------------------------------------|
| 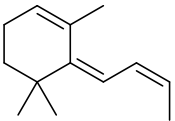   |    | Oxidation | <i>Averrhoa carambola</i>        | Guoshu Xuebao, 25(1), 119-121<br>Flavour Fragrance J., 7(4), 179-185         |
|    |    | Oxidation | <i>Atractylodes macrocephala</i> | Zhongcaoyao, 35(1), 5-8                                                      |
|    |    | Oxidation | <i>Minthostachys tomentosa</i>   | Tetrahedron: Asymmetry, 12(4), 677-683<br>Bol. Soc. Quim. Peru, 64(1), 69-73 |
|   |   | Oxidation | <i>Lycopus europaeus</i>         | J. Nat. Prod., 63(3), 419-421                                                |
|  |  | Oxidation | <i>Clausena lansium</i>          | Chin. Pharm. J. (Taipei), 48(5), 367-373<br>Zhongguo Tiaoweipin, (11), 62-65 |

|                                                                                   |                                                                                   |           |                                  |                                                                     |
|-----------------------------------------------------------------------------------|-----------------------------------------------------------------------------------|-----------|----------------------------------|---------------------------------------------------------------------|
| 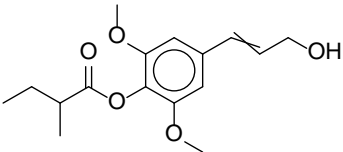 |  | Oxidation | <i>Heteroplexis microcephala</i> | Journal of Natural Products, 72(6), 1184-1190                       |
|  |  | Oxidation | <i>Glycyrrhiza lepidota</i>      | Phytochemistry, 22(2), 573-576<br>Phytochemistry, 28(12), 3556-3557 |
|  |  | Oxidation | <i>Nemipterus virgatus</i>       | Shipin Kexue (Beijing, China), 30(18), 278-281                      |
